# Supplementary material for: Size-dependent abnormal thermo-enhanced luminescence of ytterbium-doped nanoparticles
Source: Royal Society of Chemistry journal article supplement (doi:10.1039/c7nr04575a), 2017-01-01
Supplement: c7nr04575a1.pdf [file c7nr04575a1.pdf]

## Supporting Information

### Size-dependent Abnormal Thermo-enhanced Luminescence of Ytterbium Doped Nanoparticles

Xiangshui Cui<sup>ab</sup>, Yao Cheng<sup>\*a</sup>, Hang Lin<sup>a</sup>, Feng Huang<sup>a</sup> and Yuansheng Wang<sup>\*a</sup>

<sup>a</sup> Key Laboratory of Design and Assembly of Functional Nanostructures, Fujian Institute of Research on the Structure of Matter, Chinese Academy of Sciences, Fuzhou, Fujian, 350002, P. R. China.

<sup>b</sup> University of Chinese Academy of Sciences, Beijing, 100049, P. R. China.

\* Corresponding authors. E-mail addresses: chengyao@fjirsm.ac.cn;  
yswang@fjirsm.ac.cn.

#### Supporting Figures

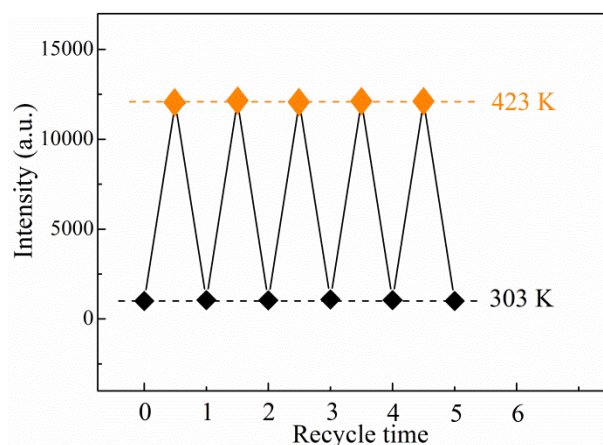

**Figure S1.** Cycle measurements of abnormal thermo-enhanced UCL of NaGdF<sub>4</sub>:Yb<sup>3+</sup>/Eu<sup>3+</sup> (20/10 mol %) LNPs with size of 10 nm.

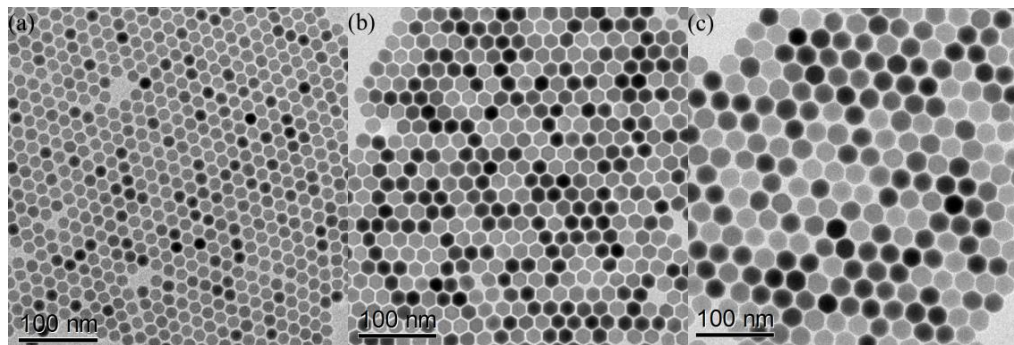

**Figure S2.** TEM micrographs of the NaGdF<sub>4</sub>: Yb<sup>3+</sup>/Eu<sup>3+</sup> (20/10 mol %) LNPs with different sizes of (a) 15 nm, (b) 20 nm, and (c) 25 nm.

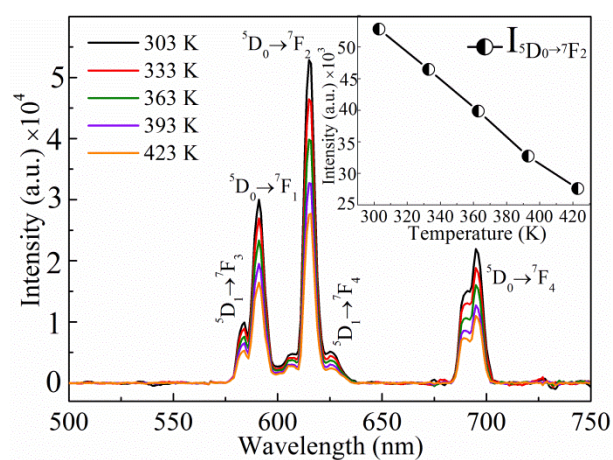

**Figure S3.** Temperature-dependent UCL emission spectra ( $\lambda_{\text{ex}}=980$  nm) of the bulk (>50 nm) NaGdF<sub>4</sub>:Yb<sup>3+</sup>/Eu<sup>3+</sup> (20/10 mol %) materials.

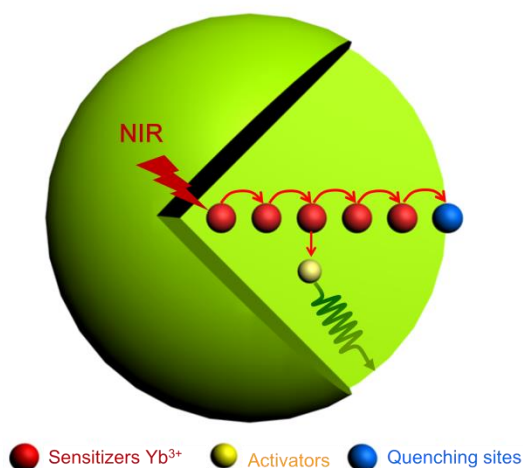

**Figure S4.** Schematic diagram of surface quenching based on the Yb<sup>3+</sup>-mediated energy migration.

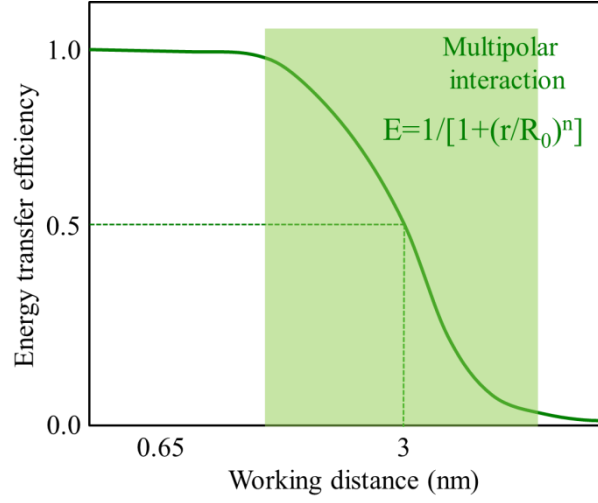

**Figure S5.** Schematic showing the influence of working distance on nonradiative energy transfer (multipolar interaction) efficiency.<sup>S1, S2, S3</sup>

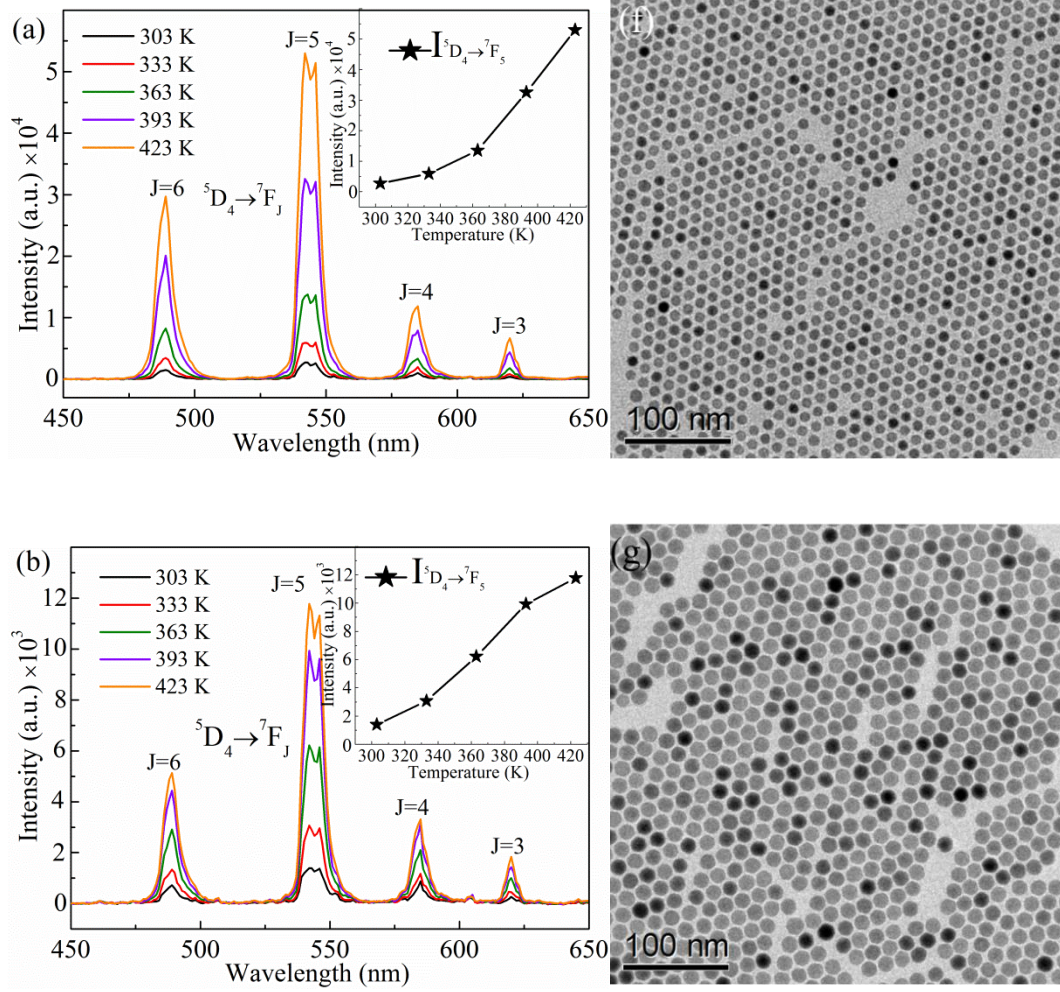



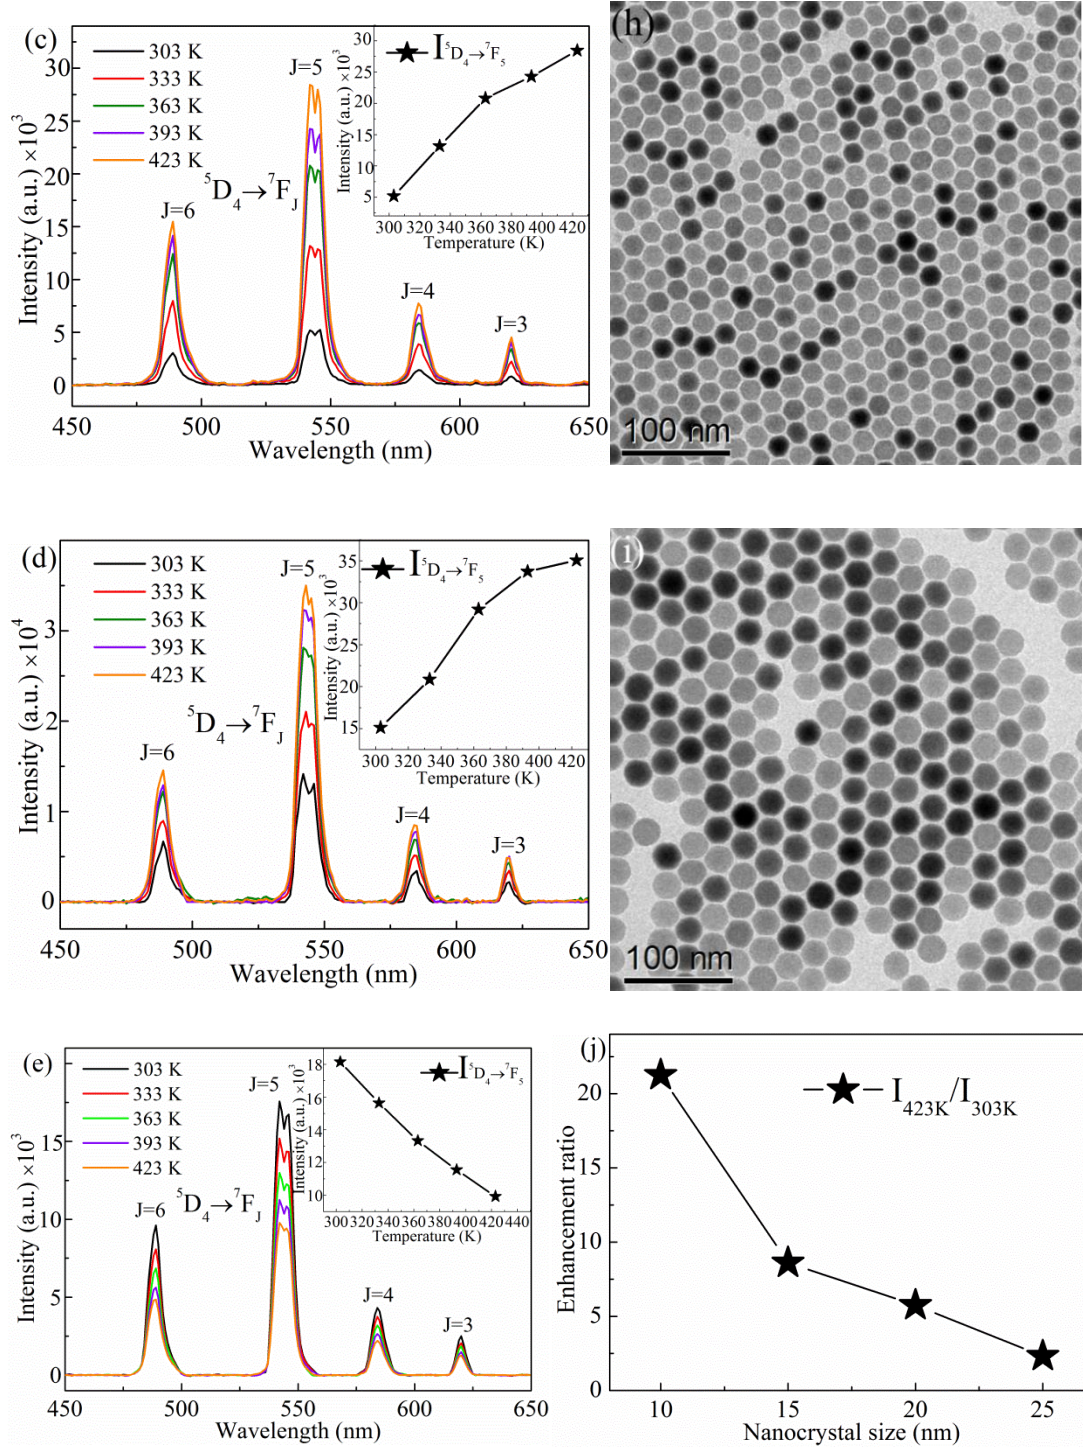

**Figure S6.** Temperature-dependent UCL emission spectra ( $\lambda_{\text{ex}}=980$  nm) of (a) 10 nm, (b) 15 nm, (c) 20 nm, (d) 25 nm, and (e) bulk NaGdF<sub>4</sub>:Yb<sup>3+</sup>/Tb<sup>3+</sup> (20/10 mol%) samples; (f-i) the corresponding TEM micrographs of the a-d samples. (j) Line chart of the integrated intensity ratio for the  $^5D_4 \rightarrow ^7F_5$  transition ( $I_{423K}/I_{303K}$ ) against the nanocrystal size.

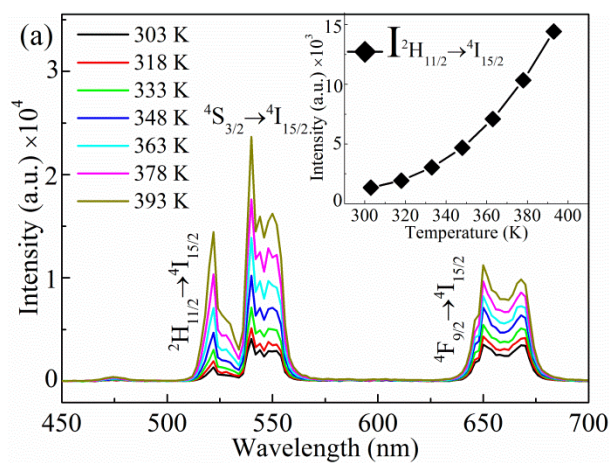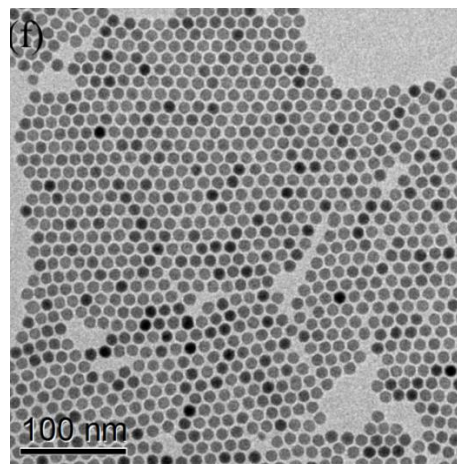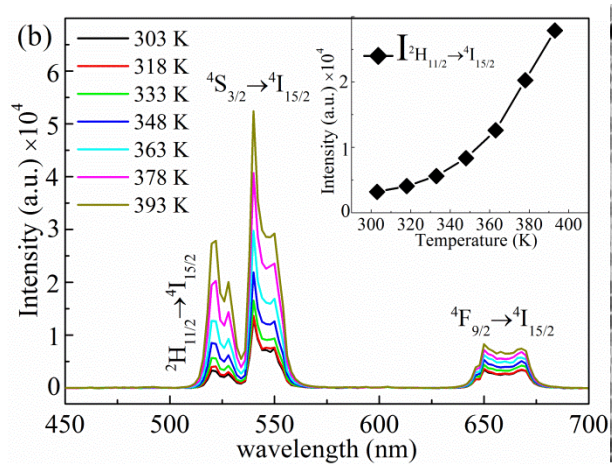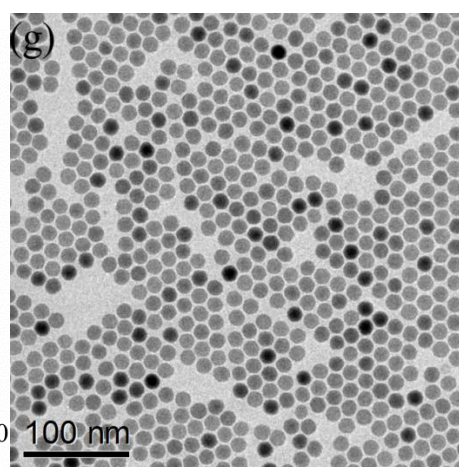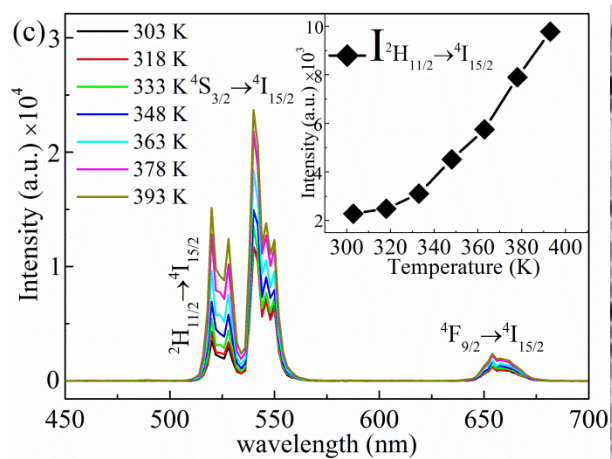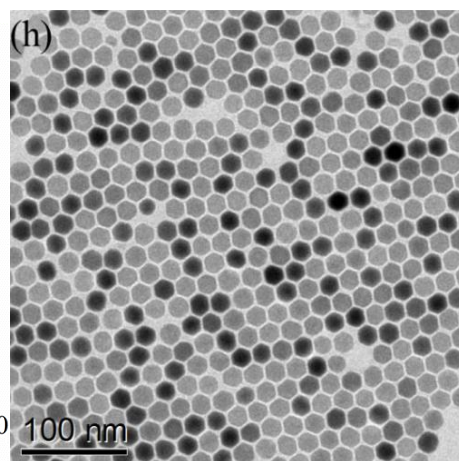



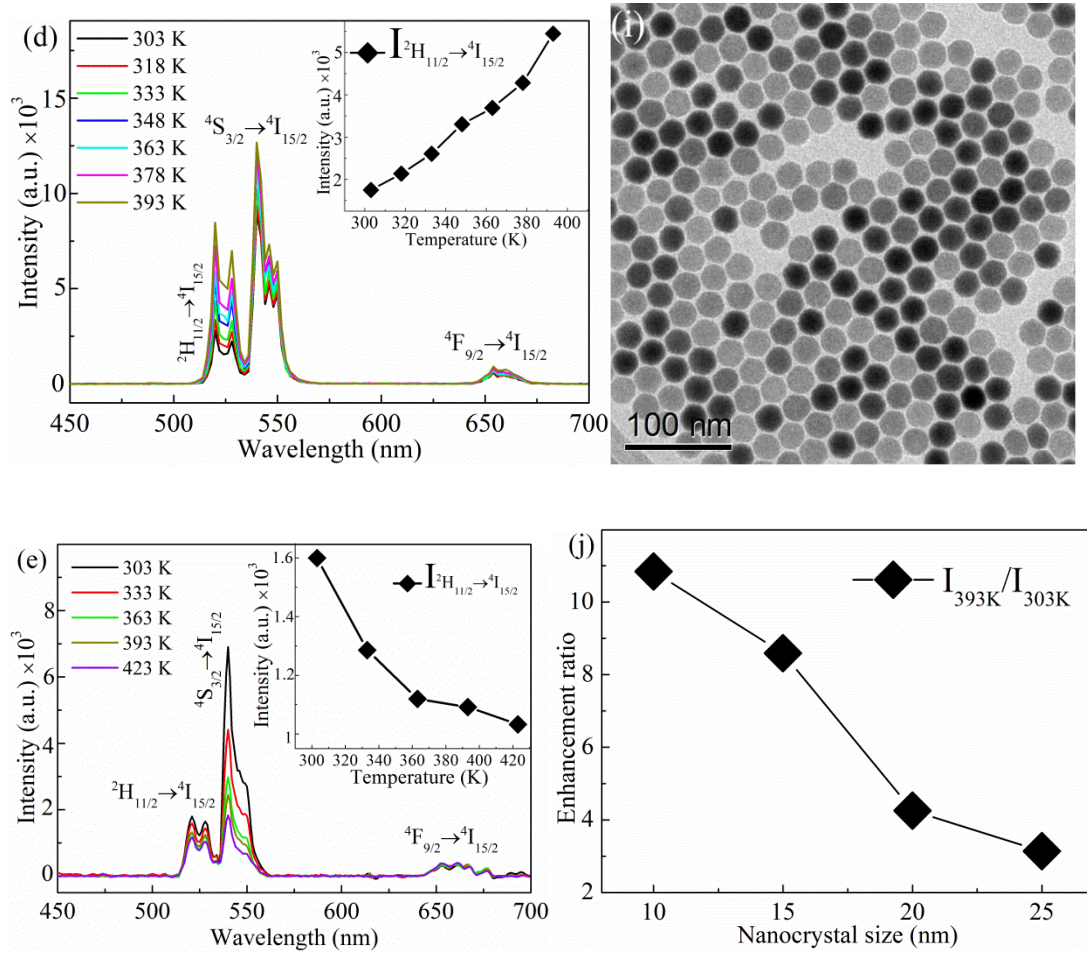

**Figure S7.** Temperature-dependent UCL emission spectra ( $\lambda_{ex}=980$  nm) of (a) 10 nm, (b) 15 nm, (c) 20 nm, (d) 25 nm, and (e) bulk NaGdF<sub>4</sub>:Yb<sup>3+</sup>/Er<sup>3+</sup> (20/0.5 mol%) samples; (f-i) the corresponding TEM micrographs of the a-d samples. (j) Line chart of the integrated intensity ratio for the  $^2H_{11/2} \rightarrow ^4I_{15/2}$  transition ( $I_{393K}/I_{303K}$ ) against the nanocrystal size.

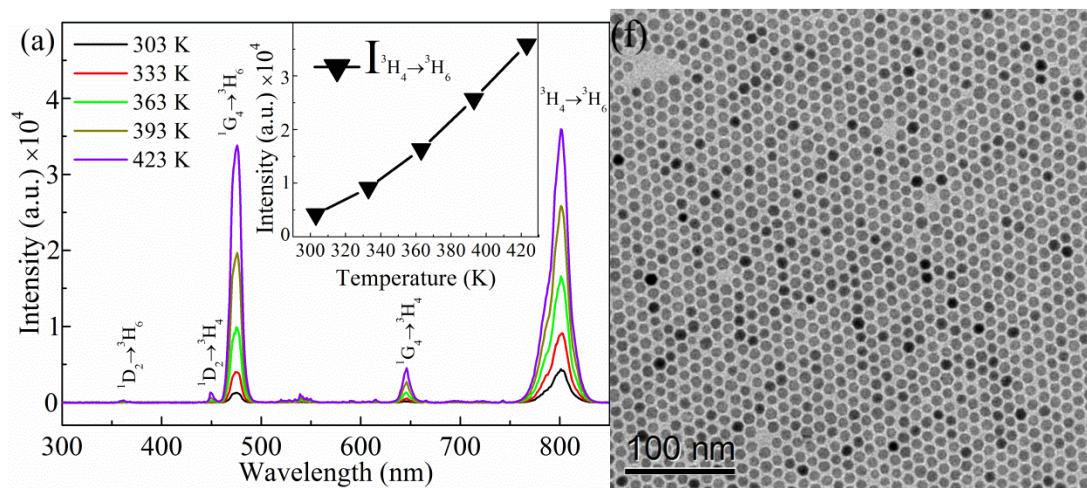

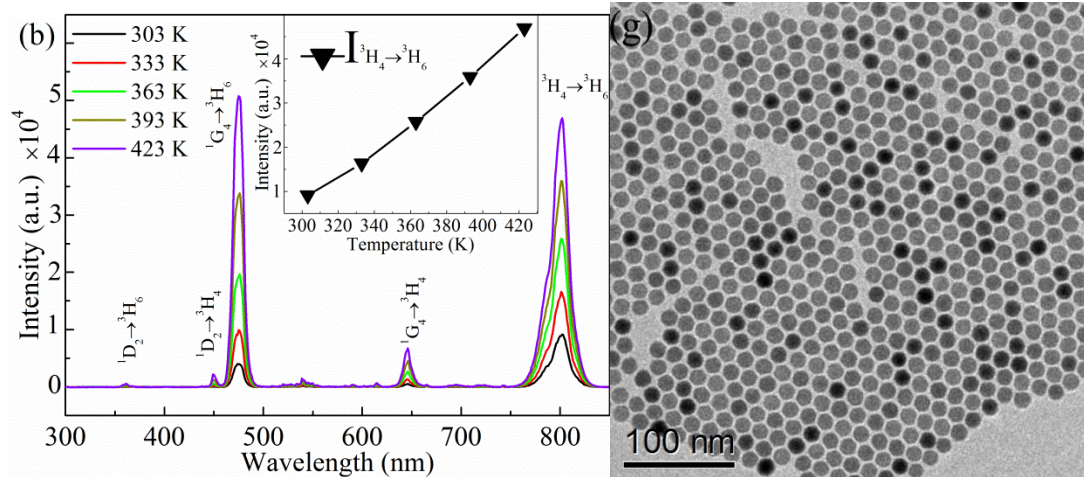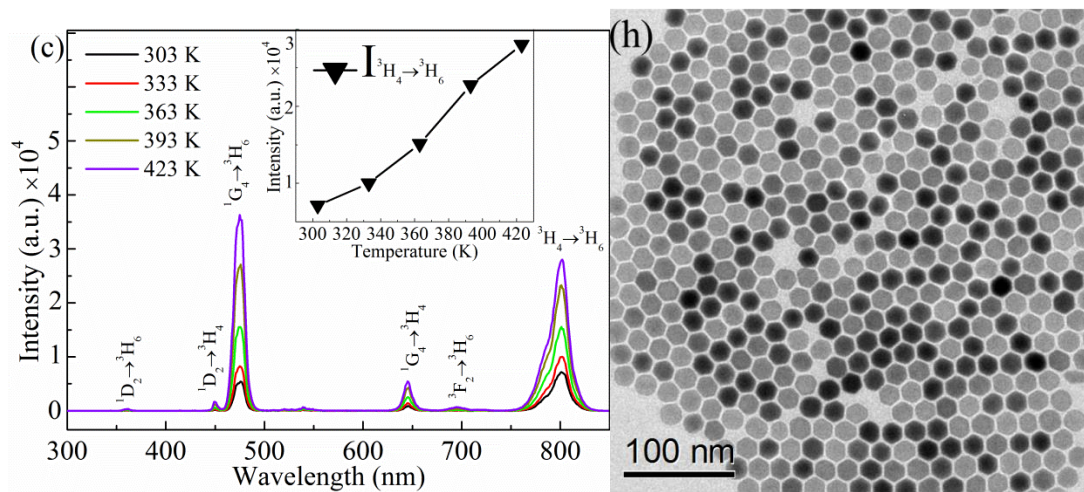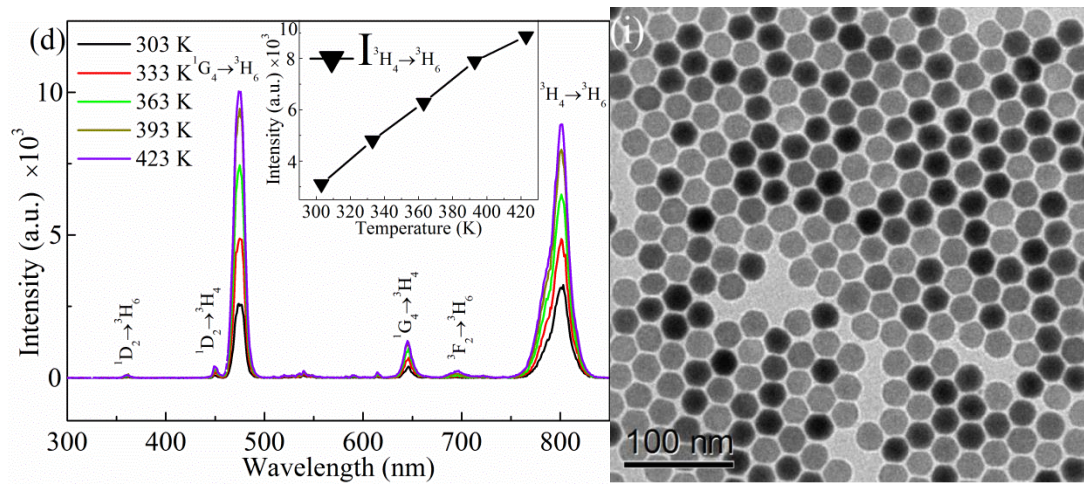



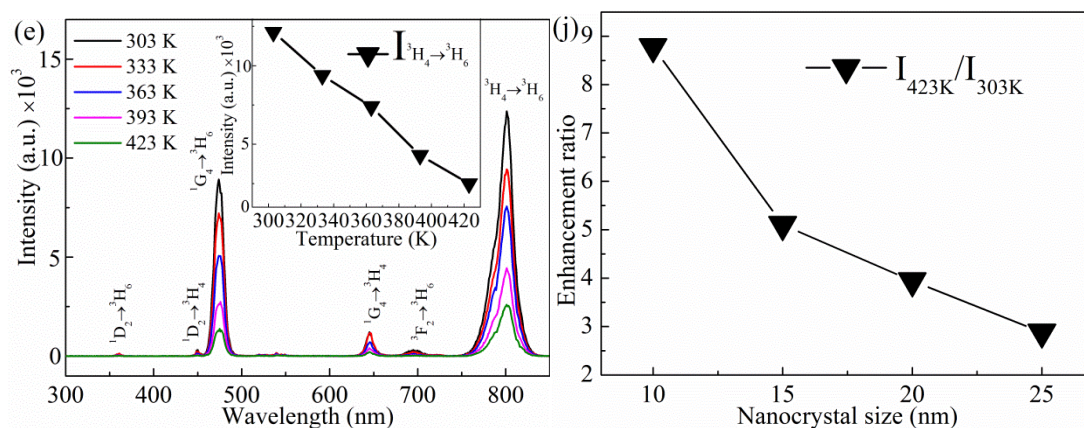

**Figure S8.** Temperature-dependent UCL emission spectra ( $\lambda_{\text{ex}}=980$  nm) of (a) 10 nm, (b) 15 nm, (c) 20 nm, (d) 25 nm, and (e) bulk NaGdF<sub>4</sub>:Yb<sup>3+</sup>/Tm<sup>3+</sup> (20/0.2 mol%) samples; (f-i) the corresponding TEM micrograph of the a-d samples. (j) Line chart of the integrated intensity ratio for the <sup>3</sup>H<sub>4</sub> → <sup>3</sup>H<sub>6</sub> transition ( $I_{423\text{K}}/I_{303\text{K}}$ ) against the nanocrystal size.

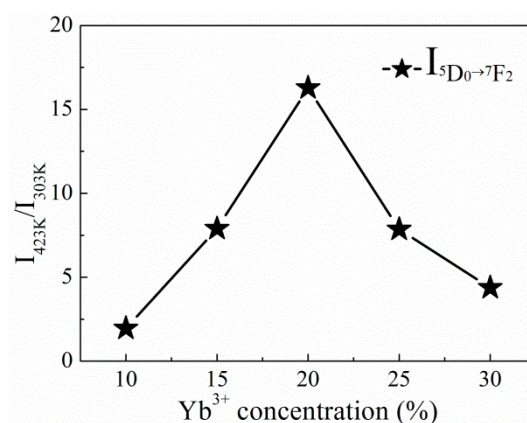

**Figure S9.** Plot of the intensity enhancement ratio of <sup>5</sup>D<sub>0</sub> → <sup>7</sup>F<sub>2</sub> transition ( $I_{423\text{K}}/I_{303\text{K}}$ ) against Yb<sup>3+</sup> doping concentration for the NaGdF<sub>4</sub>:xYb<sup>3+</sup>/10Eu<sup>3+</sup> (x=10, 15, 20, 25, 30 mol%) LNPs with size of 10 nm.



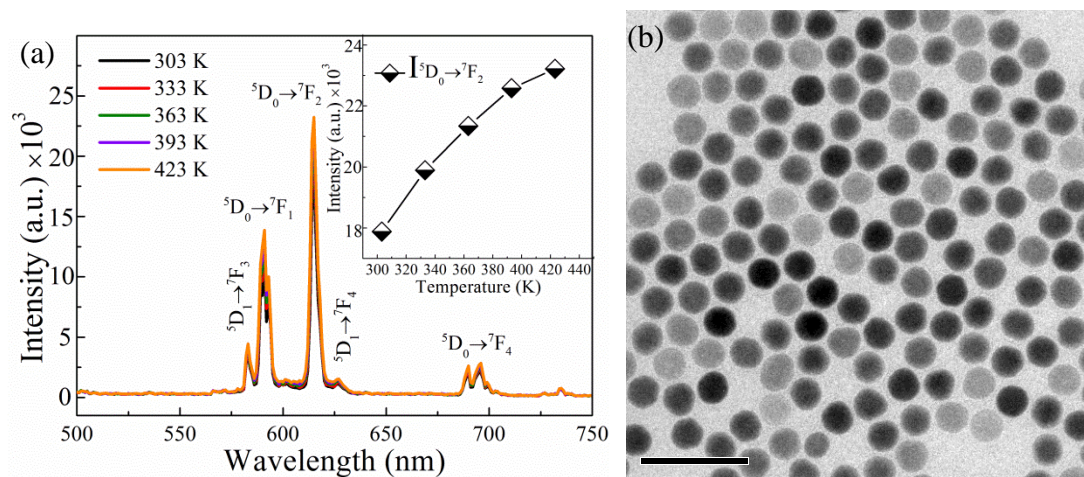

**Figure S10.** Temperature-dependent UCL emission spectra ( $\lambda_{\text{ex}}=980$  nm) of core-shell NaGdF<sub>4</sub>:Yb<sup>3+</sup>/Eu<sup>3+</sup>@NaYF<sub>4</sub> LNPs with the core size of 10 nm (a); and the corresponding TEM micrographs (b).

## References

- (S1) X. Chen, D. Peng, Q. Ju, F. Wang, *Chem. Soc. Rev.*, 2015, **44**, 1318-1330.
- (S2) X. Liu, J. R. Qiu, *Chem. Soc. Rev.*, 2015, **44**, 8714-8746.
- (S3) T. Ha, Th. Enderle, D. Ogletree, D. Chemla, P. Selvin, S. Weiss, *Proc. Natl. Acad. Sci.*, 1996, **93**, 6264-6268.
